# Supplementary material for: De Novo Mutation in Non-Tyrosine Kinase Domain of ROS1 as a Potential Predictor of Immune Checkpoint Inhibitors in Melanoma
Source: PubMed Central journal article supplement (PMC8247586; doi:10.3389/fonc.2021.666145), 2021-06-17
Supplement: DataSheet_2.pdf [file DataSheet_2.pdf]

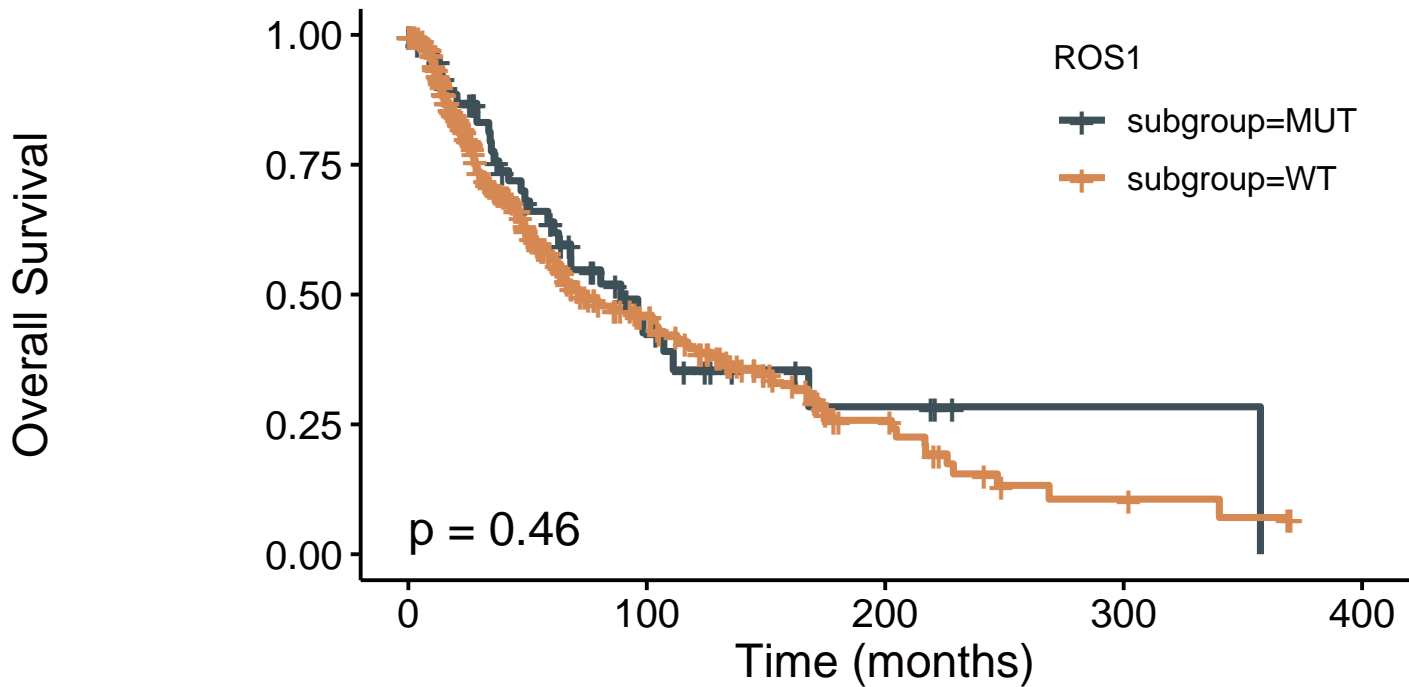

### Number at risk

|              |     |    |    |   |   |
|--------------|-----|----|----|---|---|
| subgroup=MUT | 65  | 13 | 4  | 1 | 0 |
| subgroup=WT  | 358 | 75 | 17 | 4 | 0 |
