# Supplementary material for: De Novo Mutation in Non-Tyrosine Kinase Domain of ROS1 as a Potential Predictor of Immune Checkpoint Inhibitors in Melanoma
Source: PubMed Central journal article supplement (PMC8247586; doi:10.3389/fonc.2021.666145), 2021-06-17

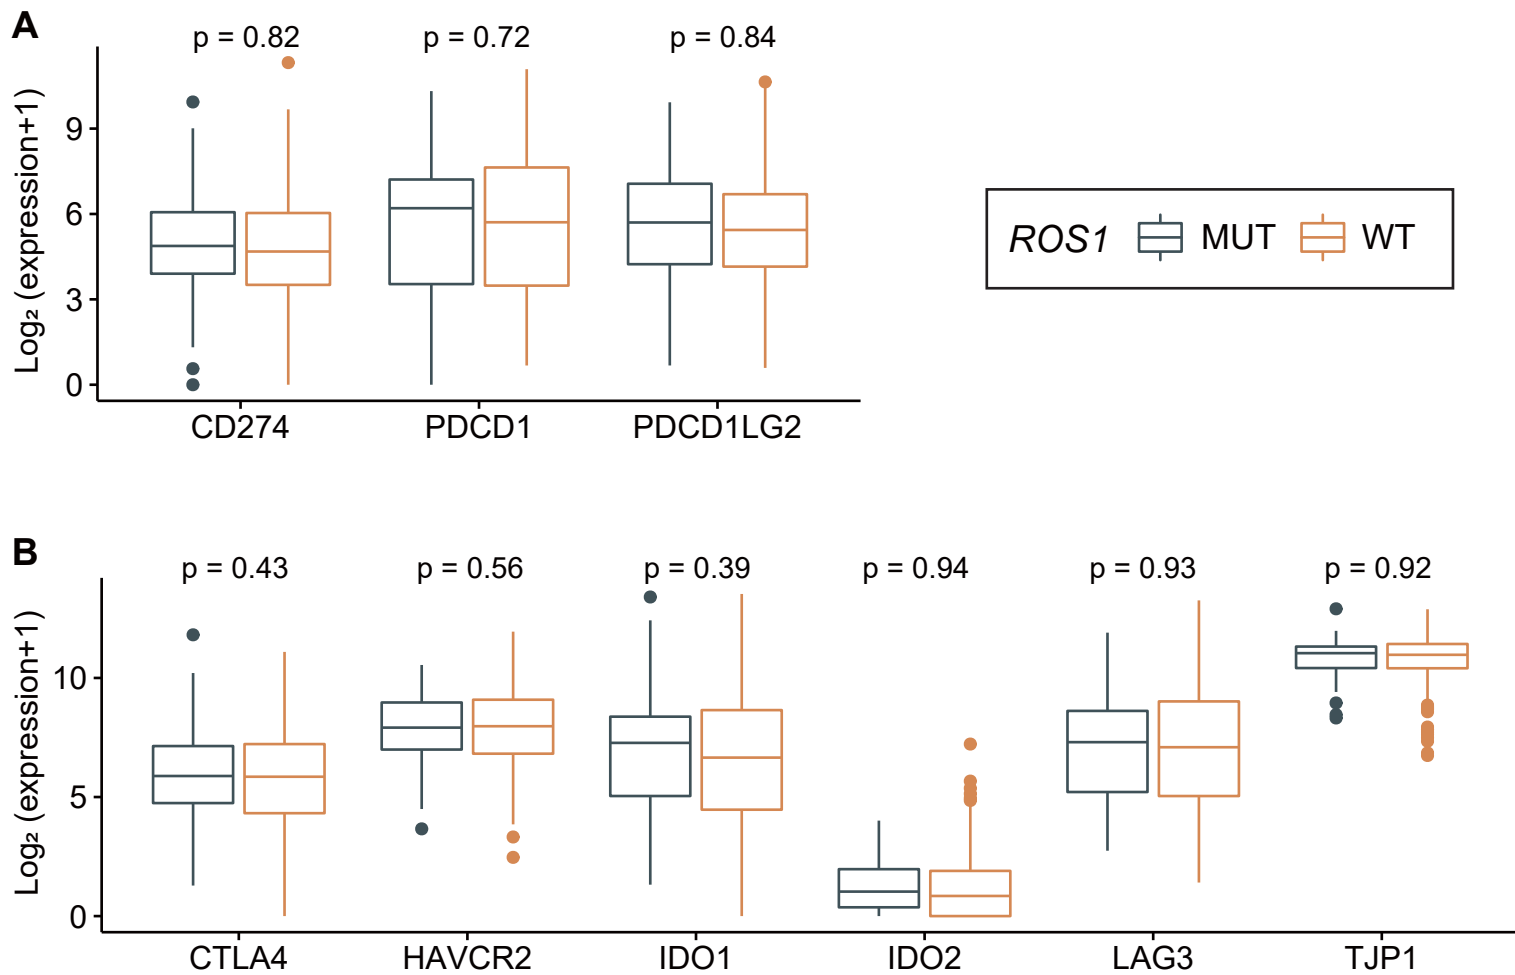

Supplement: DataSheet_3.pdf [file DataSheet_3.pdf]
