# Supplementary material for: De Novo Mutation in Non-Tyrosine Kinase Domain of ROS1 as a Potential Predictor of Immune Checkpoint Inhibitors in Melanoma
Source: PubMed Central journal article supplement (PMC8247586; doi:10.3389/fonc.2021.666145), 2021-06-17
Supplement: DataSheet_6.pdf [file DataSheet_6.pdf]

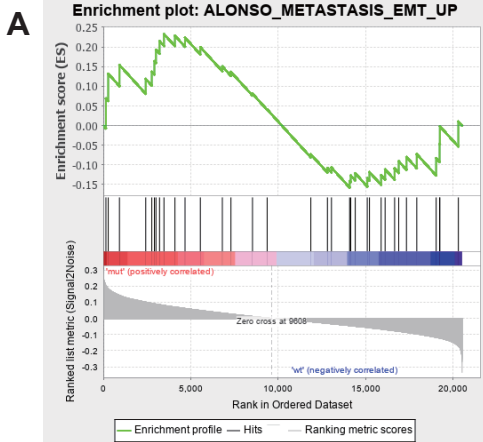

NES = 0.7815  
FDR q-value = 0.8275

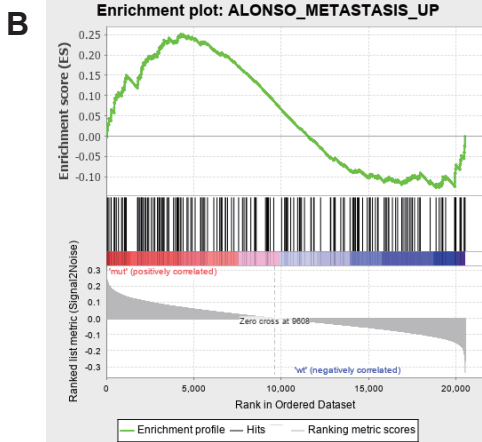

NES = 1.0692  
FDR q-value = 0.4983

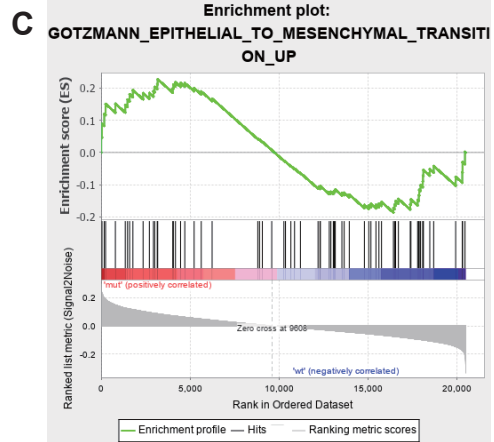

NES = 0.8038  
FDR q-value = 0.6852
